# Supplementary material
Source: PubMed Central journal article supplement (PMC4918437)
Supplement: ismej2015230x3.pdf [file ismej2015230x3.pdf]

**Table S3.** Results of tree topology tests for the dataset in Figure S1.

| Data        | Tree        | logL      | deltaL  | bp-RELL* | p-KH*    | p-SH*    | c-ELW*   |
|-------------|-------------|-----------|---------|----------|----------|----------|----------|
| 16S rRNA    | 16S rRNA    | -3130.05  | 0.00    | 1.0000 + | 1.0000 + | 1.0000 + | 1.0000 + |
|             | <i>trpB</i> | -4812.52  | 1682.48 | 0.0000 - | 0.0000 - | 0.0000 - | 0.0000 - |
|             | <i>gyrB</i> | -4679.99  | 1549.94 | 0.0000 - | 0.0000 - | 0.0000 - | 0.0000 - |
|             | <i>rpoB</i> | -4657.95  | 1527.90 | 0.0000 - | 0.0000 - | 0.0000 - | 0.0000 - |
|             | <i>atpD</i> | -4789.51  | 1659.46 | 0.0000 - | 0.0000 - | 0.0000 - | 0.0000 - |
|             | <i>recA</i> | -4512.03  | 1381.98 | 0.0000 - | 0.0000 - | 0.0000 - | 0.0000 - |
| <i>trpB</i> | 16S rRNA    | -14061.37 | 3526.89 | 0.0000 - | 0.0000 - | 0.0000 - | 0.0000 - |
|             | <i>trpB</i> | -10534.48 | 0.00    | 1.0000 + | 1.0000 + | 1.0000 + | 1.0000 + |
|             | <i>gyrB</i> | -12072.06 | 1537.59 | 0.0000 - | 0.0000 - | 0.0000 - | 0.0000 - |
|             | <i>rpoB</i> | -12307.05 | 1772.57 | 0.0000 - | 0.0000 - | 0.0000 - | 0.0000 - |
|             | <i>atpD</i> | -12521.32 | 1986.85 | 0.0000 - | 0.0000 - | 0.0000 - | 0.0000 - |
|             | <i>recA</i> | -12107.64 | 1573.17 | 0.0000 - | 0.0000 - | 0.0000 - | 0.0000 - |
| <i>gyrB</i> | 16S rRNA    | -13469.01 | 4066.09 | 0.0000 - | 0.0000 - | 0.0000 - | 0.0000 - |
|             | <i>trpB</i> | -10645.80 | 1242.89 | 0.0000 - | 0.0000 - | 0.0000 - | 0.0000 - |
|             | <i>gyrB</i> | -9402.92  | 0.00    | 1.0000 + | 1.0000 + | 1.0000 + | 1.0000 + |
|             | <i>rpoB</i> | -10862.54 | 1459.62 | 0.0000 - | 0.0000 - | 0.0000 - | 0.0000 - |
|             | <i>atpD</i> | -11393.12 | 1990.20 | 0.0000 - | 0.0000 - | 0.0000 - | 0.0000 - |
|             | <i>recA</i> | -11077.20 | 1674.28 | 0.0000 - | 0.0000 - | 0.0000 - | 0.0000 - |
| <i>rpoB</i> | 16S rRNA    | -11908.15 | 4134.72 | 0.0000 - | 0.0000 - | 0.0000 - | 0.0000 - |
|             | <i>trpB</i> | -9471.34  | 1697.91 | 0.0000 - | 0.0000 - | 0.0000 - | 0.0000 - |
|             | <i>gyrB</i> | -9582.95  | 1809.52 | 0.0000 - | 0.0000 - | 0.0000 - | 0.0000 - |
|             | <i>rpoB</i> | -7773.43  | 0.00    | 1.0000 + | 1.0000 + | 1.0000 + | 1.0000 + |
|             | <i>atpD</i> | -10203.17 | 2429.74 | 0.0000 - | 0.0000 - | 0.0000 - | 0.0000 - |
|             | <i>recA</i> | -9817.47  | 2044.04 | 0.0000 - | 0.0000 - | 0.0000 - | 0.0000 - |
| <i>atpD</i> | 16S rRNA    | -9036.27  | 3806.01 | 0.0000 - | 0.0000 - | 0.0000 - | 0.0000 - |
|             | <i>trpB</i> | -7319.46  | 2089.20 | 0.0000 - | 0.0000 - | 0.0000 - | 0.0000 - |
|             | <i>gyrB</i> | -7176.25  | 1945.99 | 0.0000 - | 0.0000 - | 0.0000 - | 0.0000 - |
|             | <i>rpoB</i> | -7370.29  | 2140.03 | 0.0000 - | 0.0000 - | 0.0000 - | 0.0000 - |
|             | <i>atpD</i> | -5230.26  | 0.00    | 1.0000 + | 1.0000 + | 1.0000 + | 1.0000 + |
|             | <i>recA</i> | -7504.43  | 2274.17 | 0.0000 - | 0.0000 - | 0.0000 - | 0.0000 - |
| <i>recA</i> | 16S rRNA    | -10671.71 | 3047.17 | 0.0000 - | 0.0000 - | 0.0000 - | 0.0000 - |
|             | <i>trpB</i> | -8841.54  | 1217.00 | 0.0000 - | 0.0000 - | 0.0000 - | 0.0000 - |
|             | <i>gyrB</i> | -8622.65  | 998.11  | 0.0000 - | 0.0000 - | 0.0000 - | 0.0000 - |
|             | <i>rpoB</i> | -8873.51  | 1248.97 | 0.0000 - | 0.0000 - | 0.0000 - | 0.0000 - |
|             | <i>atpD</i> | -9356.50  | 1731.97 | 0.0000 - | 0.0000 - | 0.0000 - | 0.0000 - |

|             |          |      |          |          |          |          |
|-------------|----------|------|----------|----------|----------|----------|
| <i>recA</i> | -7624.54 | 0.00 | 1.0000 + | 1.0000 + | 1.0000 + | 1.0000 + |
|-------------|----------|------|----------|----------|----------|----------|

---

deltaL: logL difference from the maximal logL in the set

bp-RELL: bootstrap proportion using RELL method (Kishino *et al.*, 1990)

p-KH: p-value of one sided Kishino-Hasegawa test (Kishino and Hasegawa, 1989)

p-SH: p-value of Shimodaira-Hasegawa test (Shimodaira and Hasegawa, 2000)

c-ELW: Expected Likelihood Weight (Strimmer and Rambaut, 2002)

\* Plus signs denote the 95% confidence sets. Minus signs denote significant exclusion.

All tests performed 1000 re-samplings using the RELL method.
