# Supplementary material
Source: PubMed Central journal article supplement (PMC4918437)

**a**

# 16S rRNA

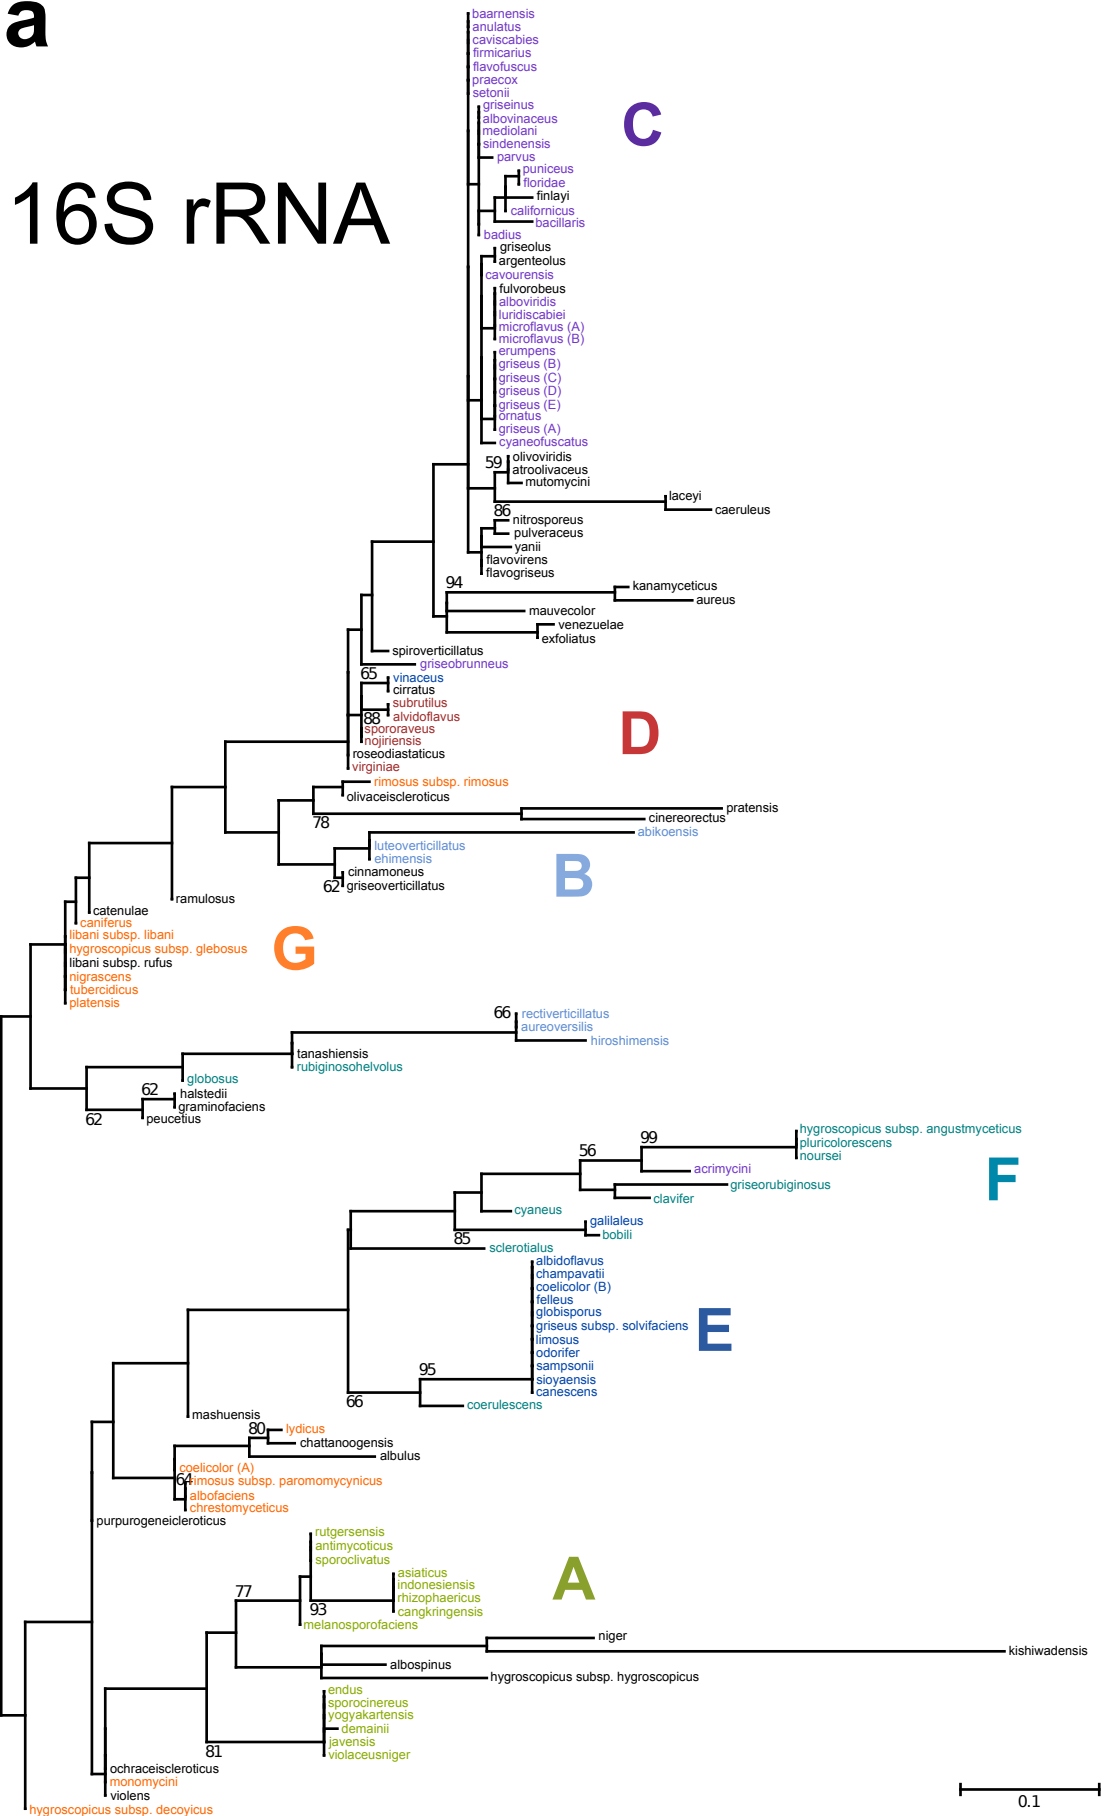

**b***trpB*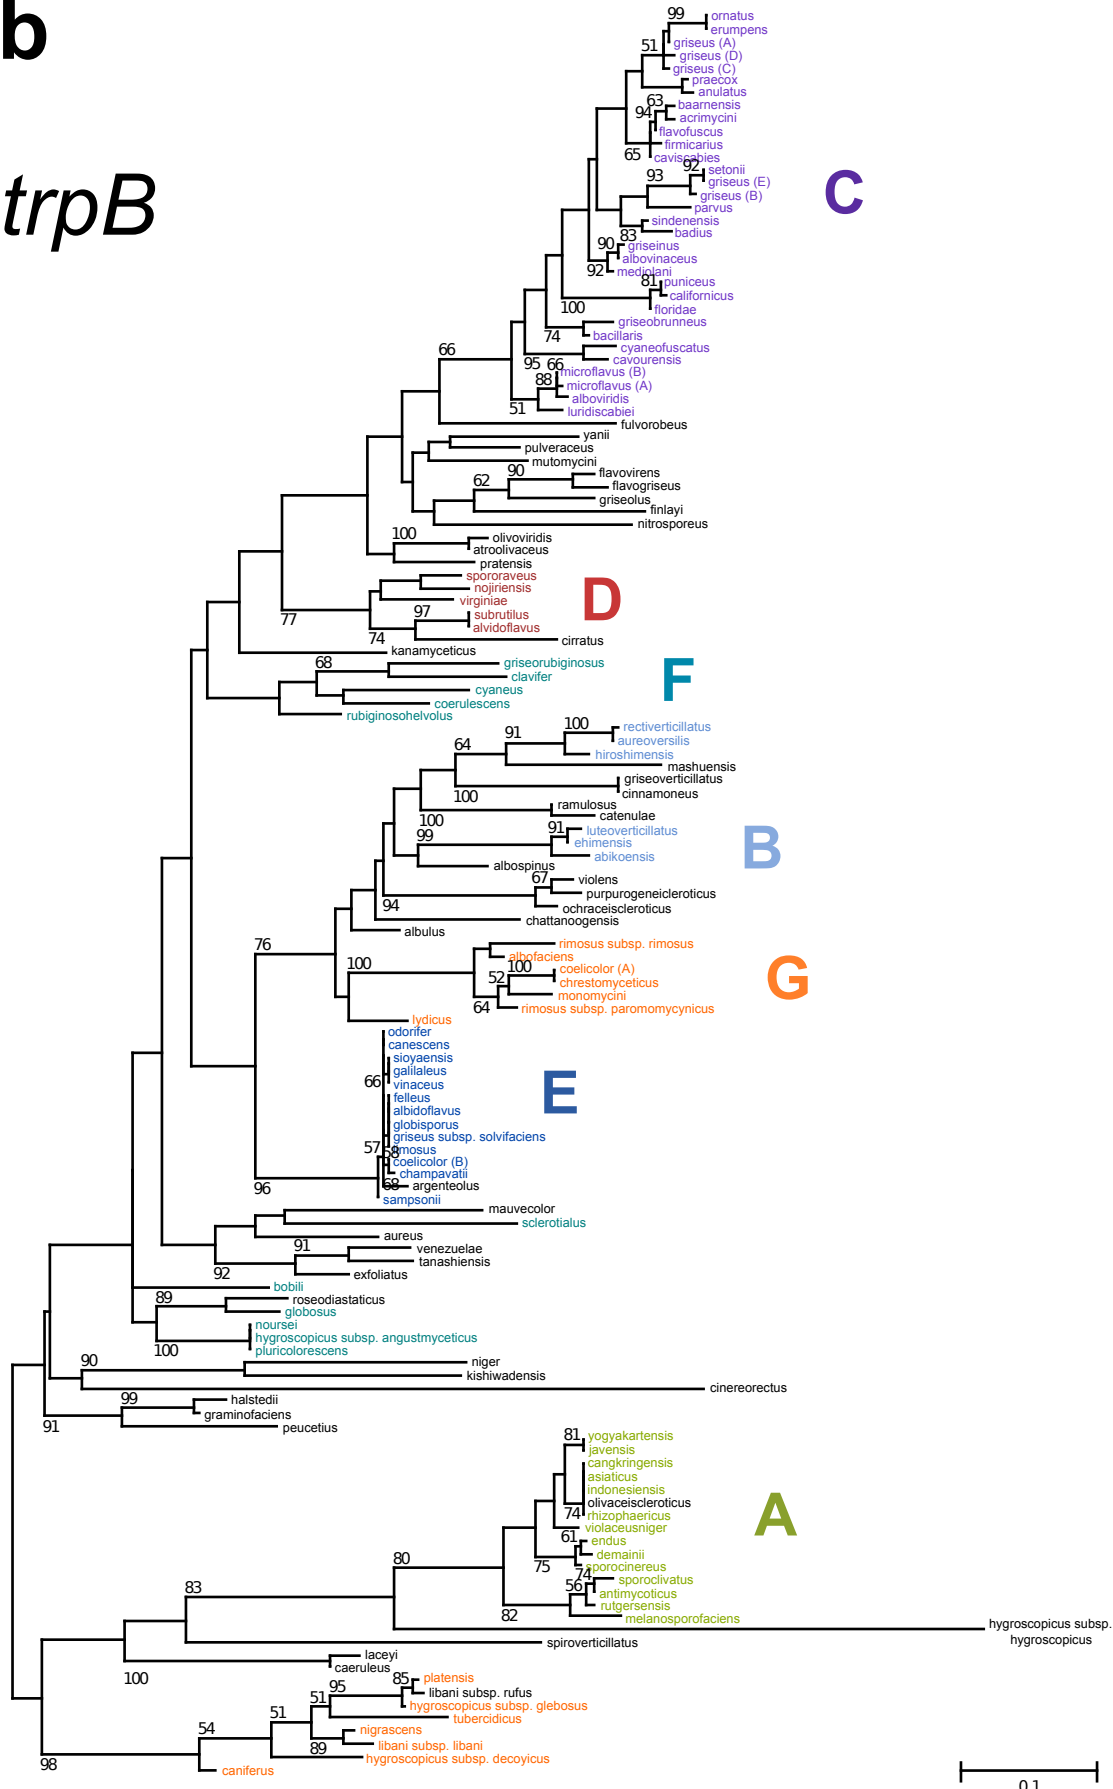

**C***gyrB*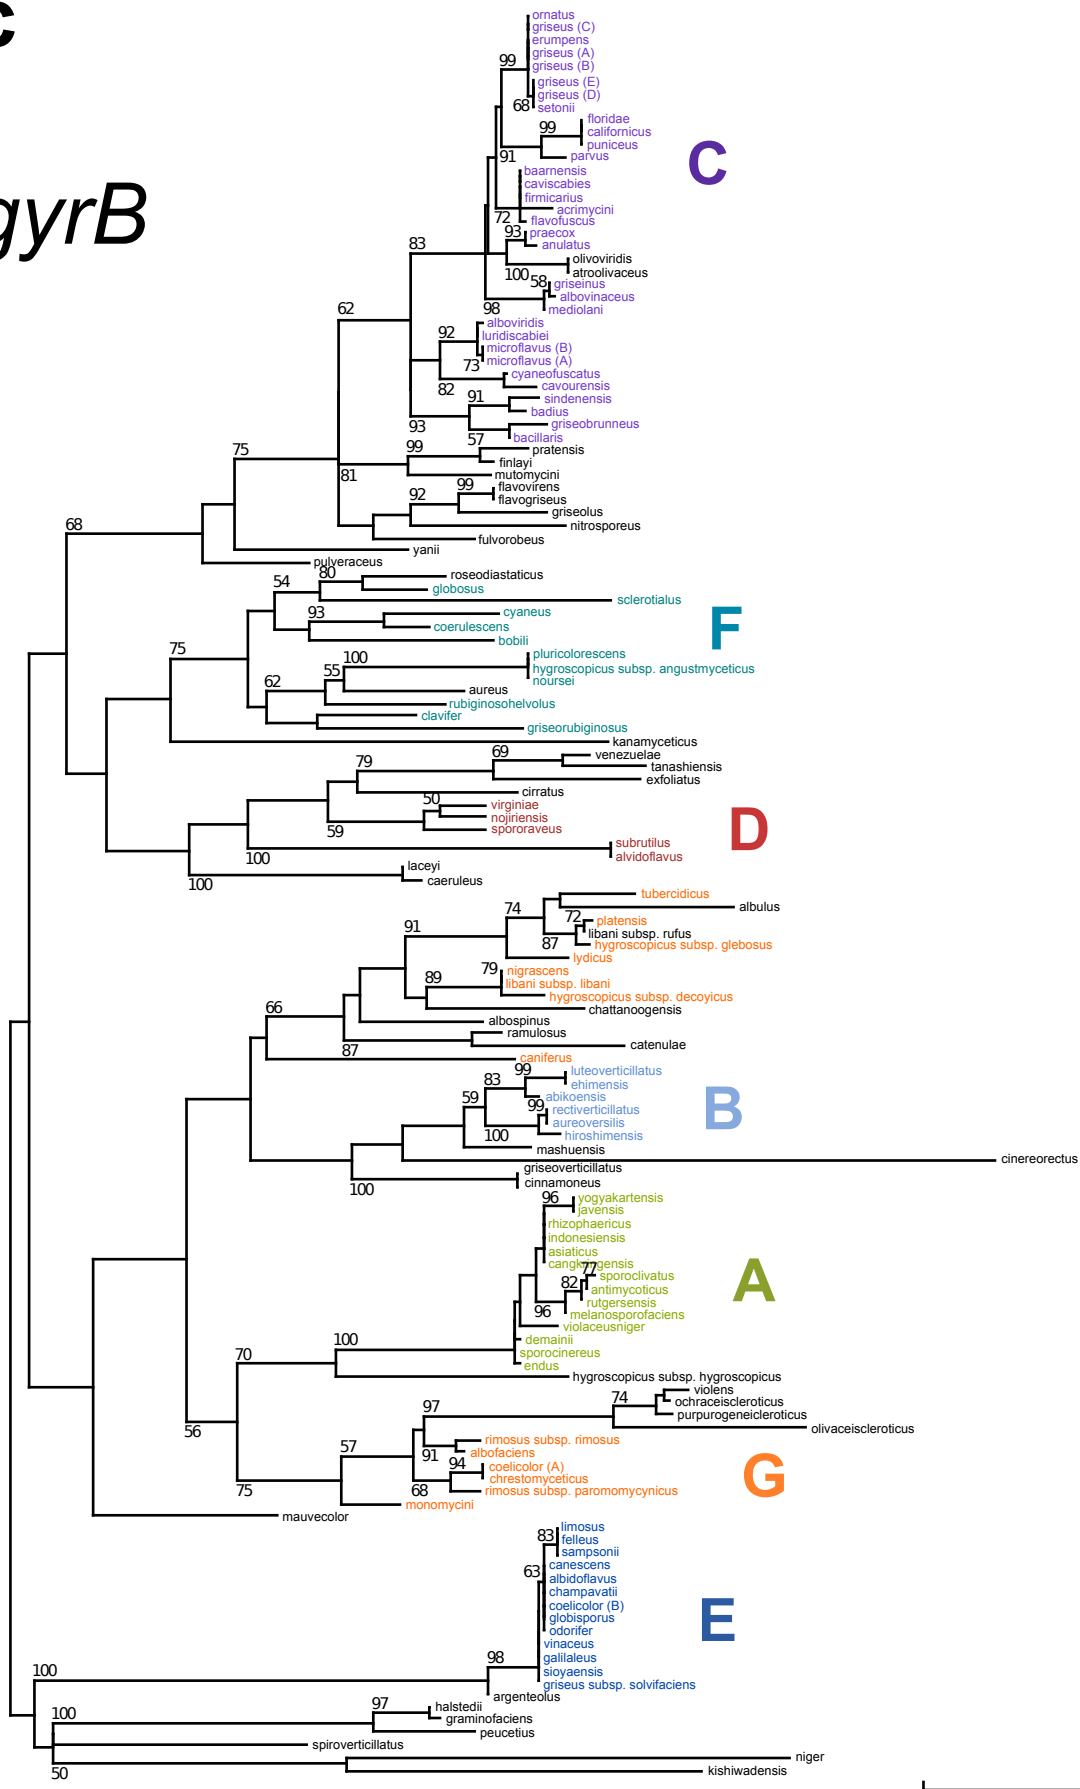

0.1

d

rpoB

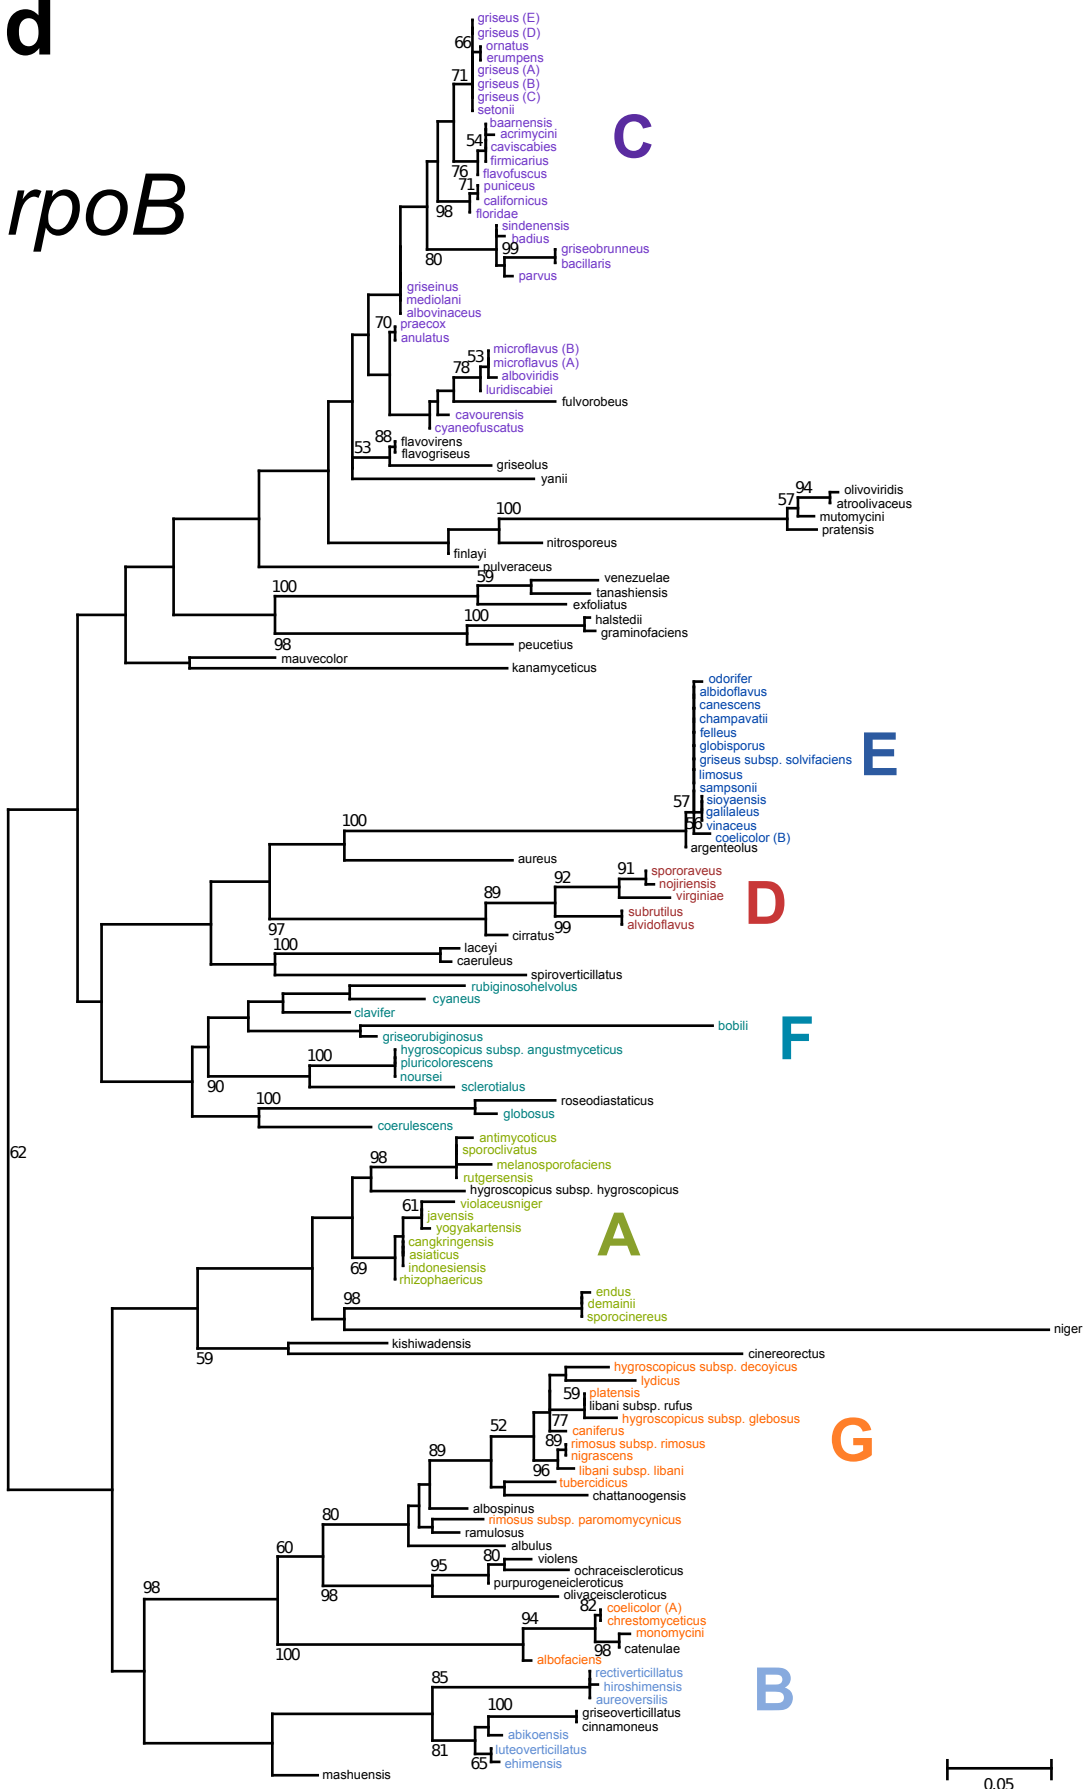

e

*atpD*

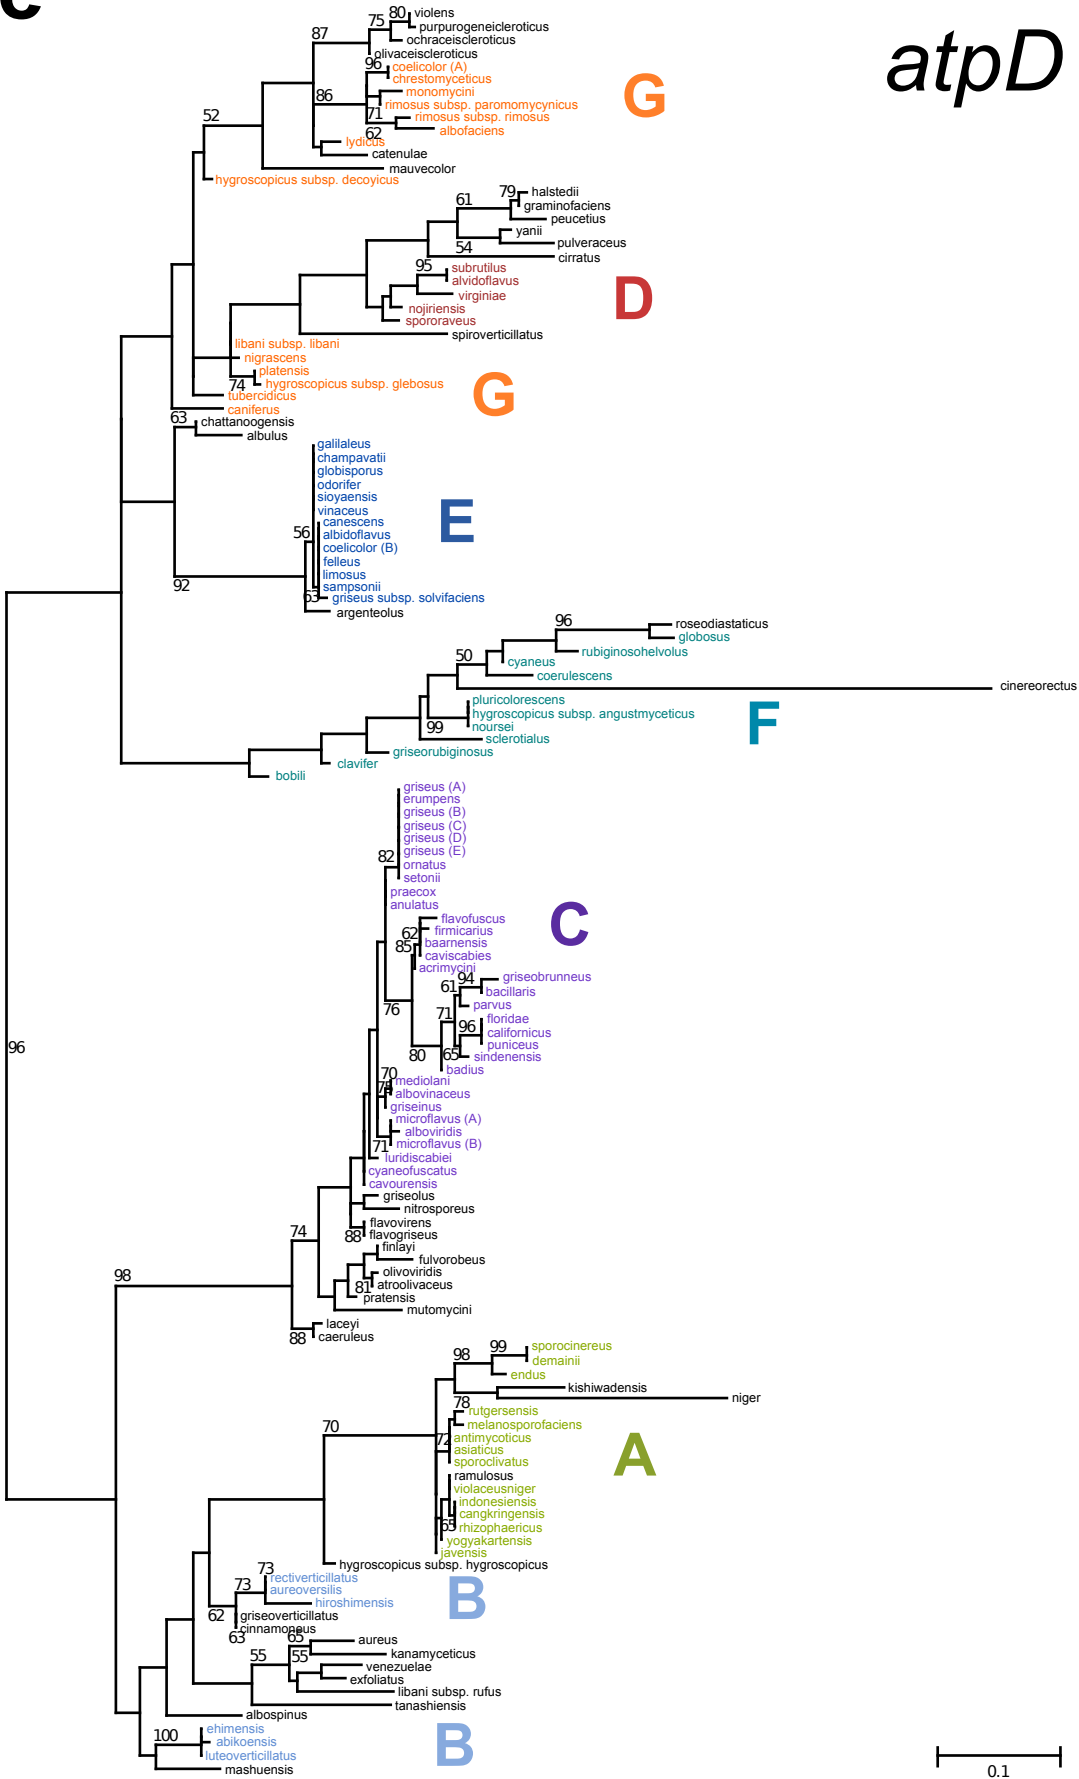

0.1

**f**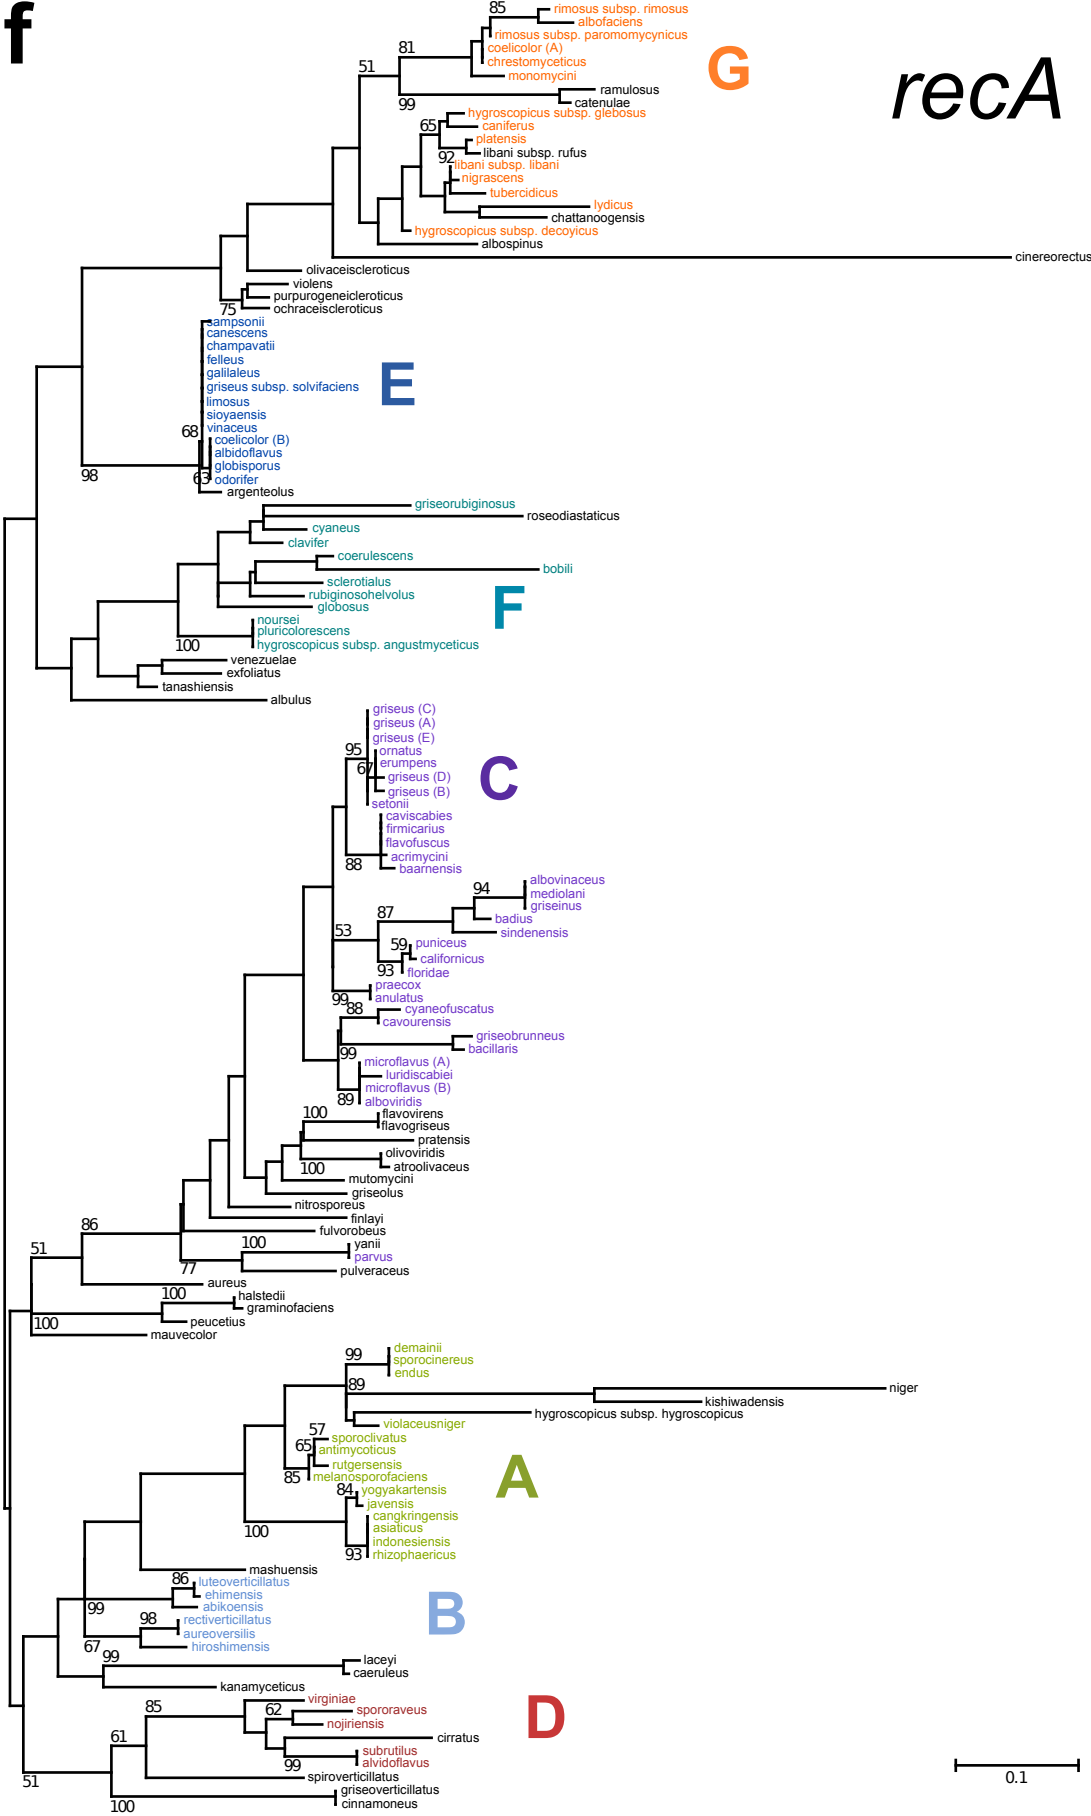

Supplement: ismej2015230x5.pdf [file ismej2015230x5.pdf]

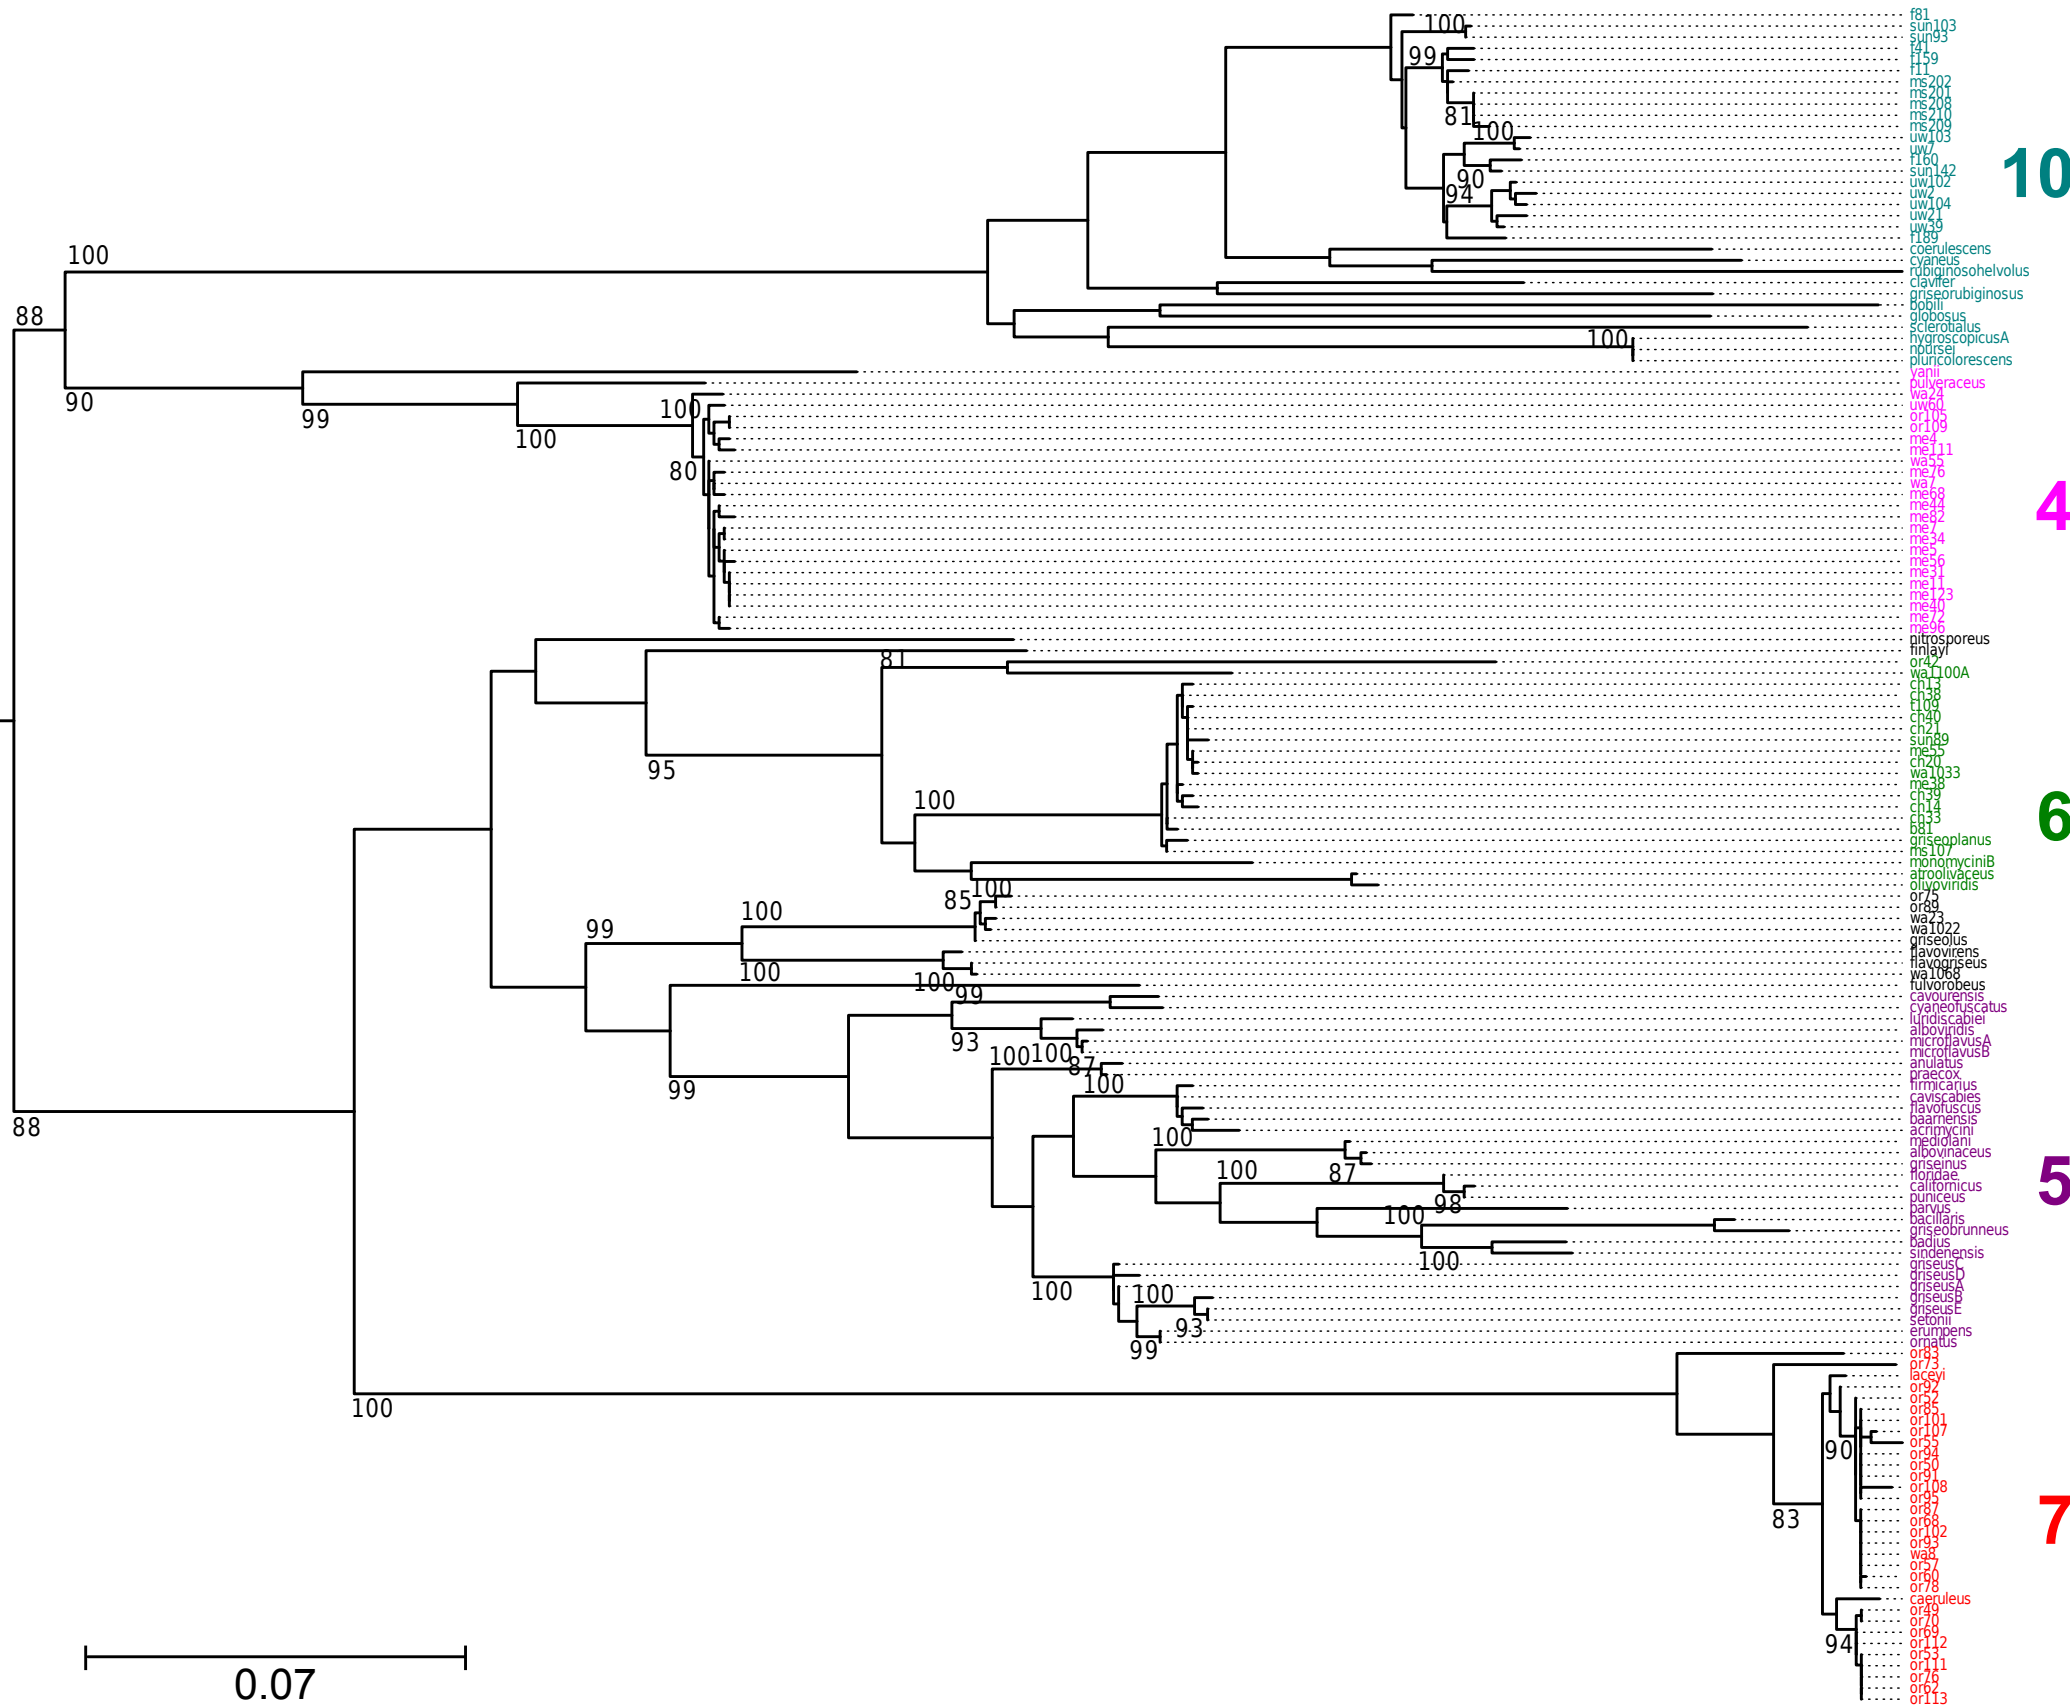

Supplement: ismej2015230x7.pdf [file ismej2015230x7.pdf]

**a***trpB*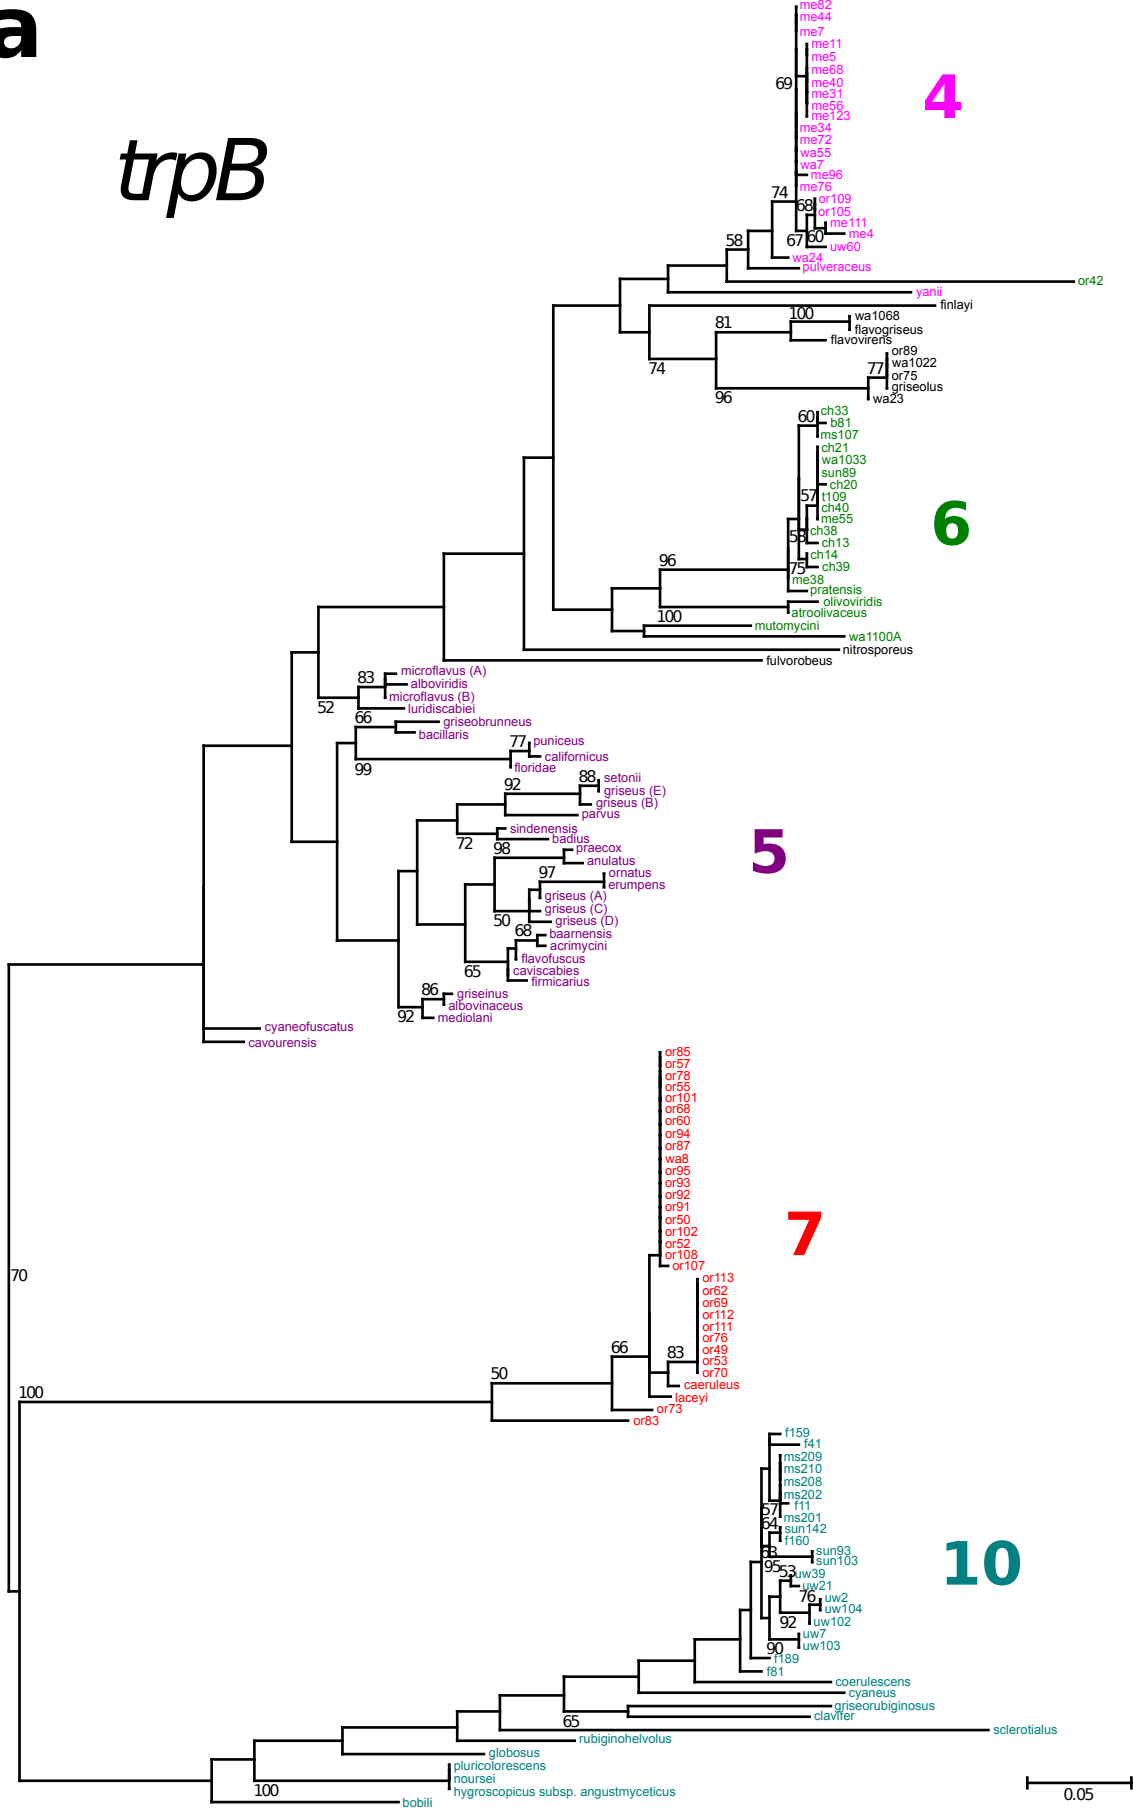

**b***gyrB*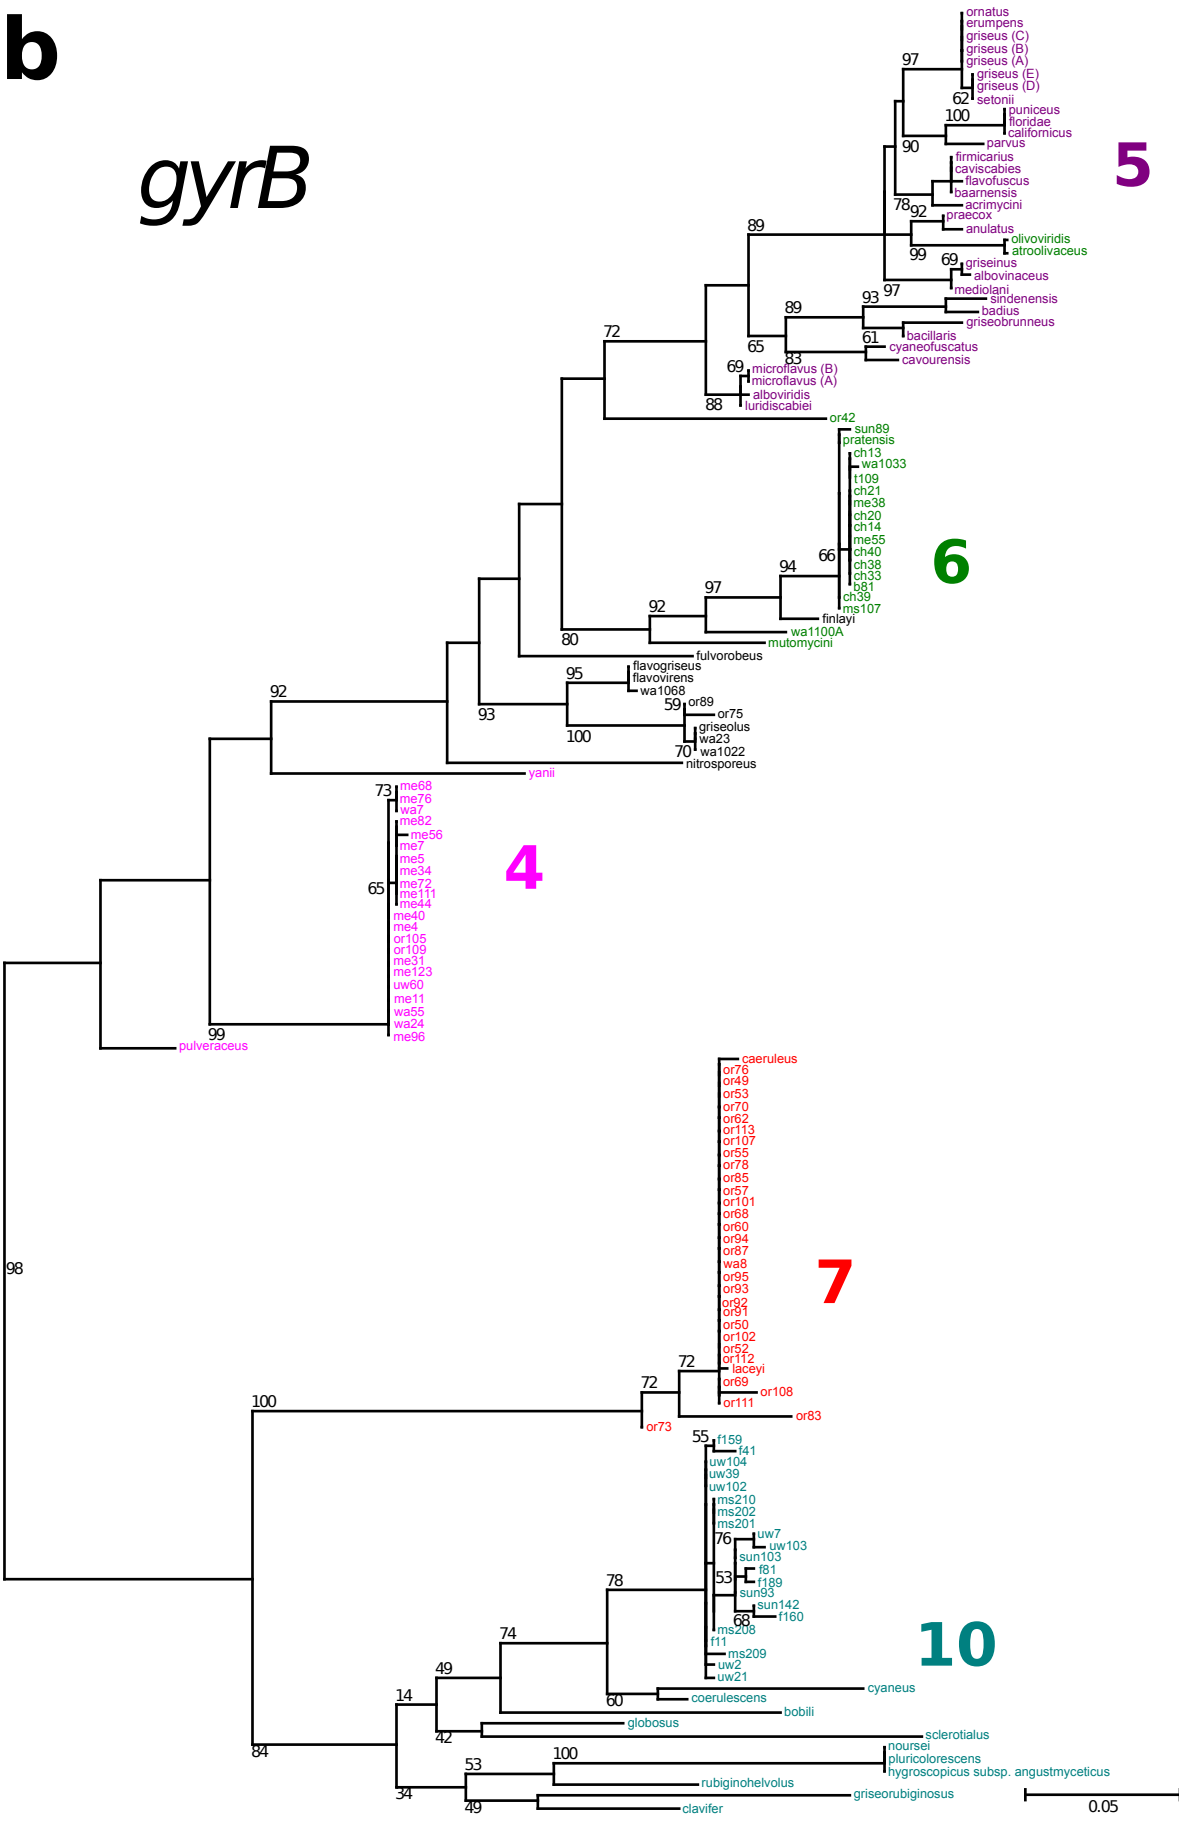**5****6****4****7****10**

**C***rpoB*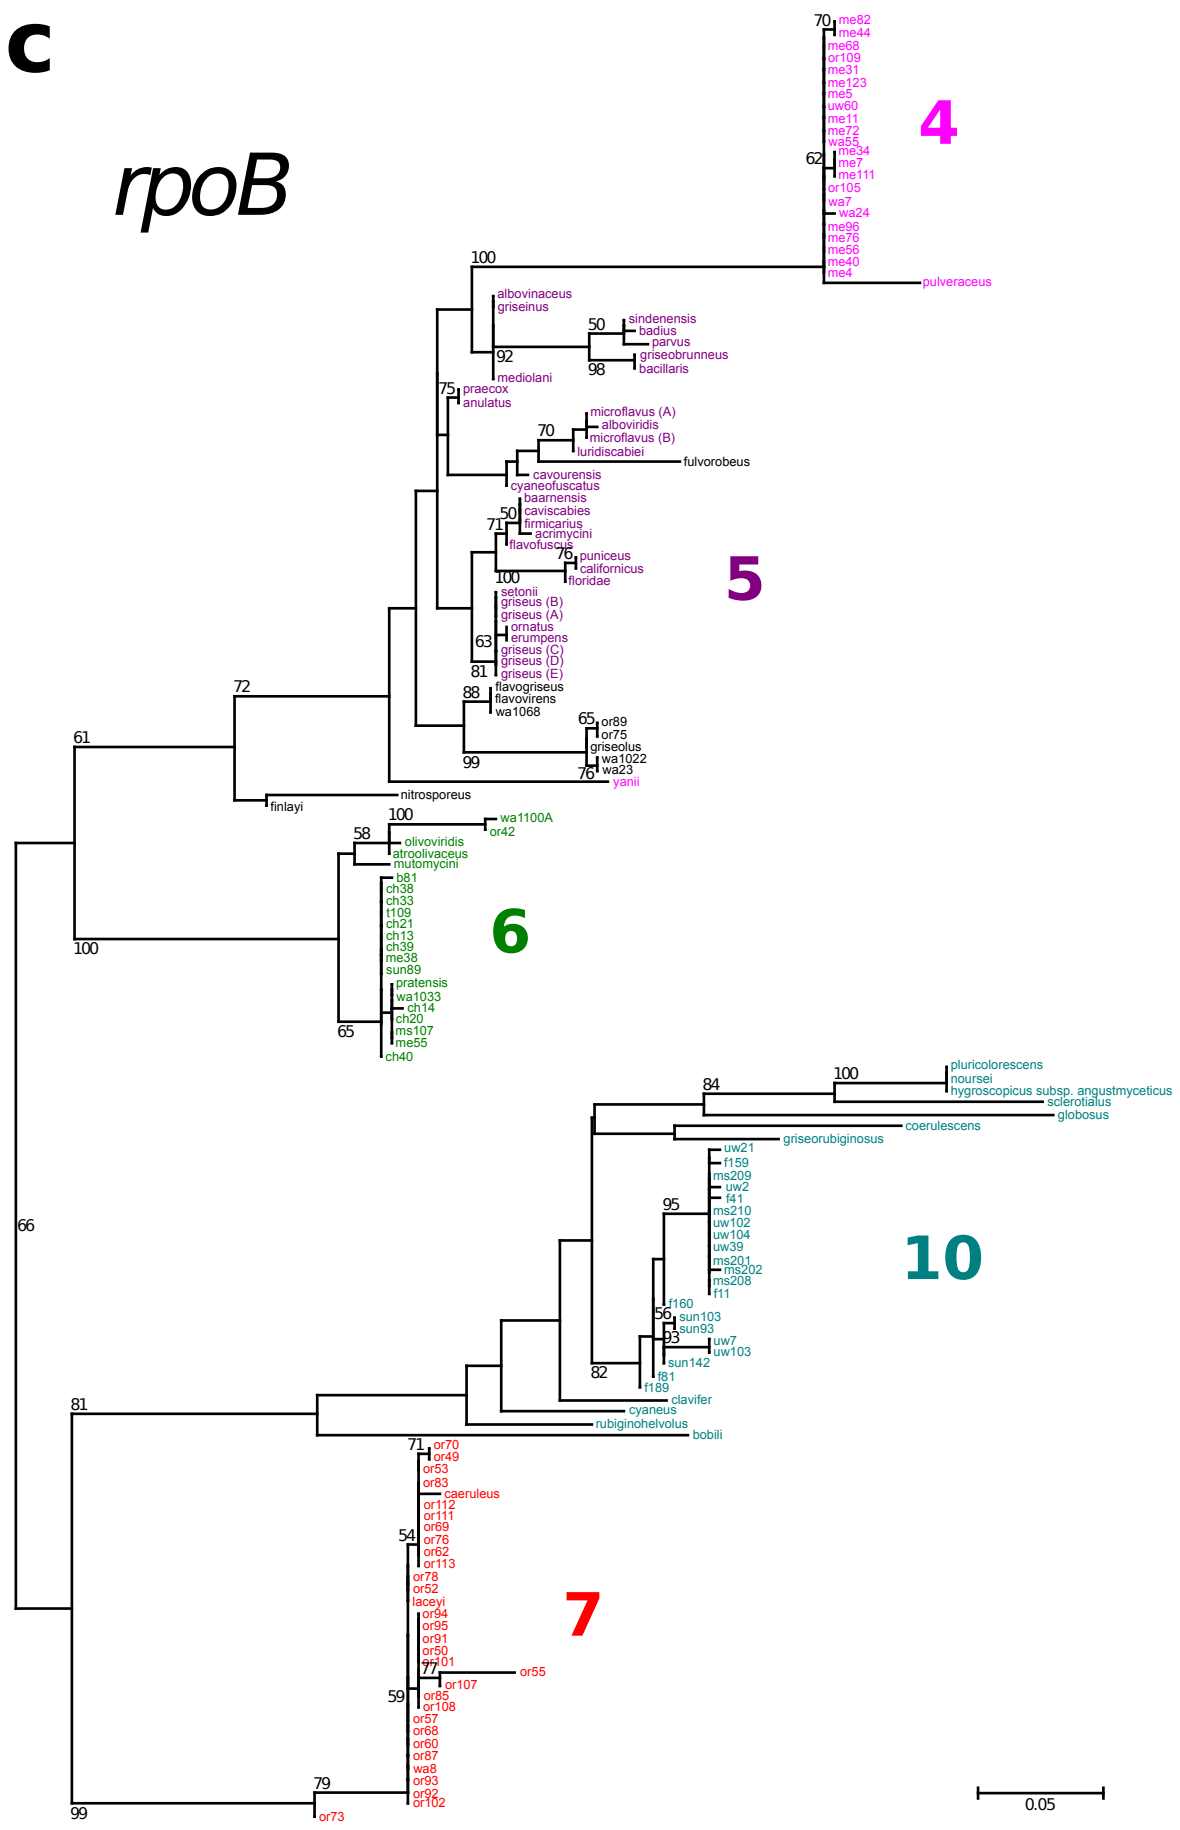

d

*atpD*

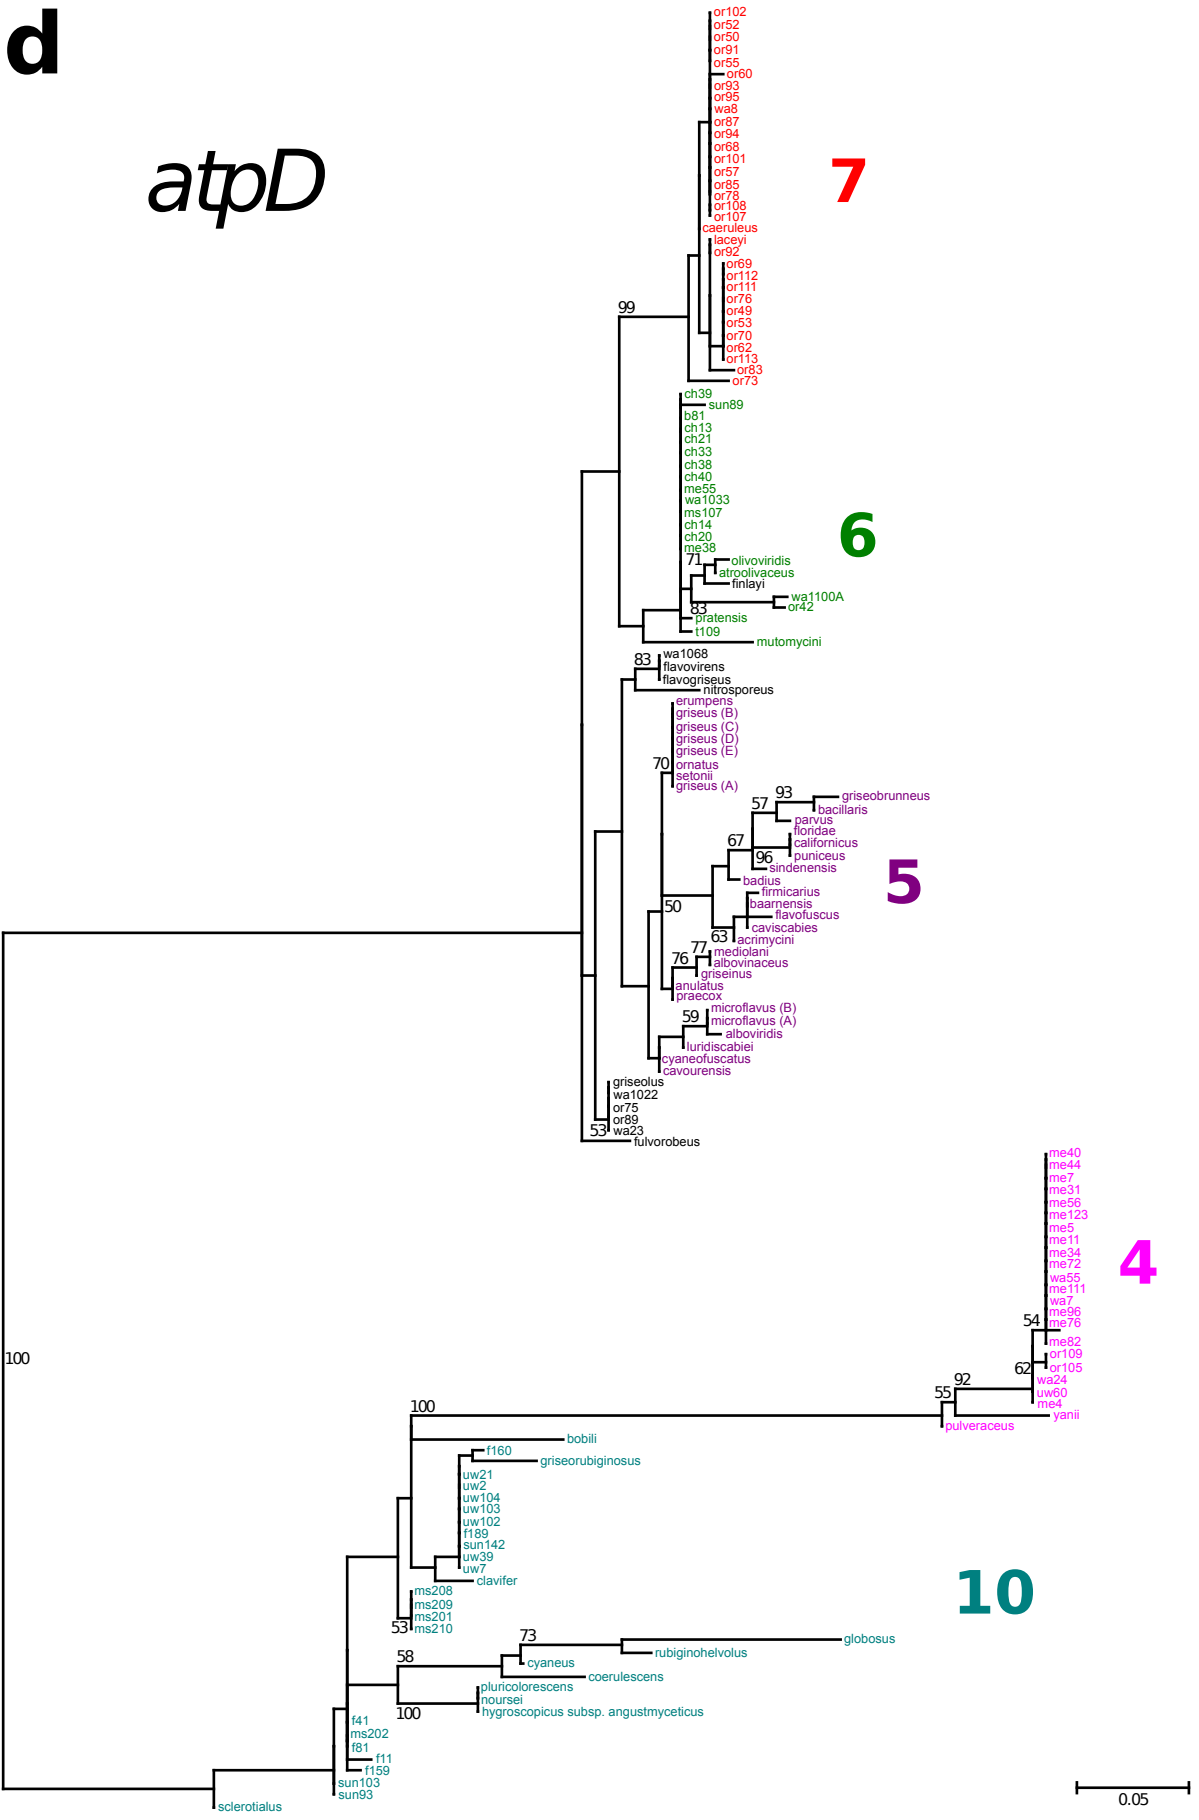

e

*recA*

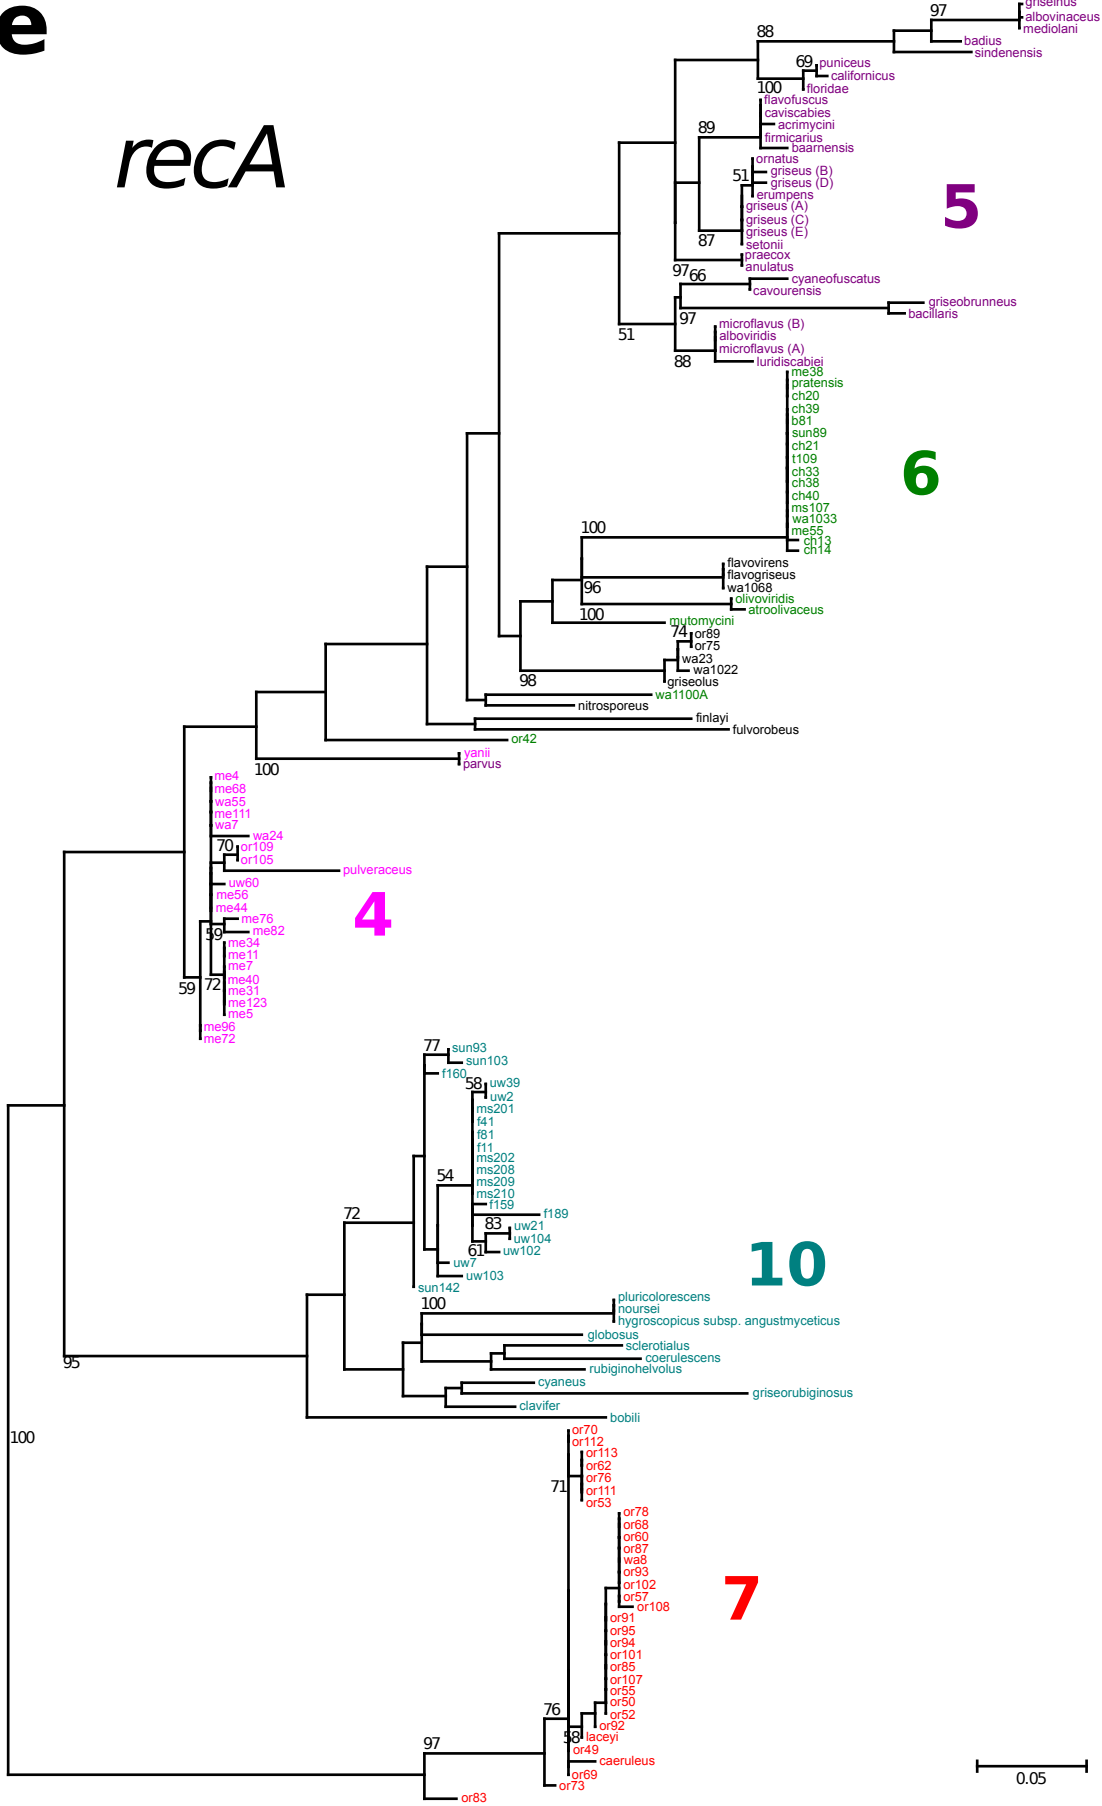

Supplement: ismej2015230x8.pdf [file ismej2015230x8.pdf]
